# Supplementary material for: Normal breast epithelial MCF-10A cells to evaluate the safety of carbon dots
Source: Royal Society of Chemistry journal article supplement (doi:10.1039/d0md00317d), 2020-12-11
Supplement: d0md00317d1.pdf [file d0md00317d1.pdf]

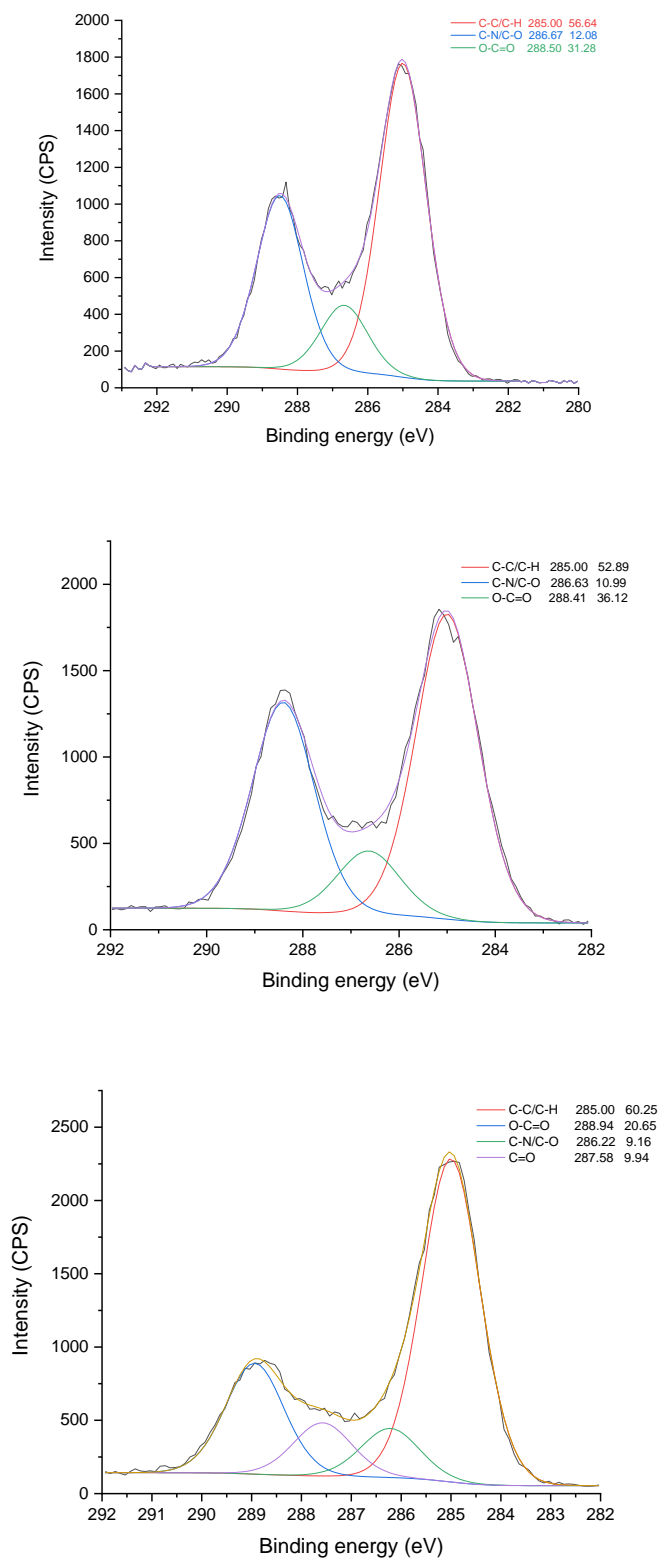

**Figure S1** – XPS C 1s spectra for calcinated- (top), microwave- (middle) and hydrothermal-based (bottom) C-dots.

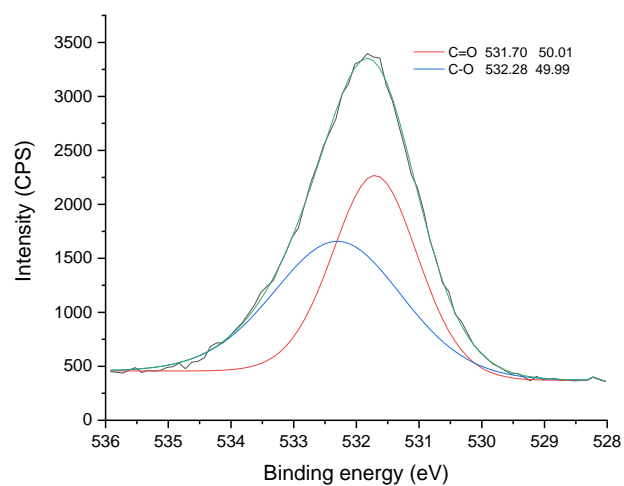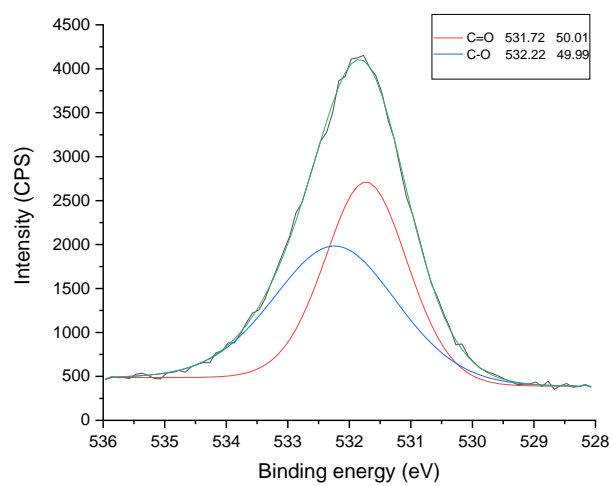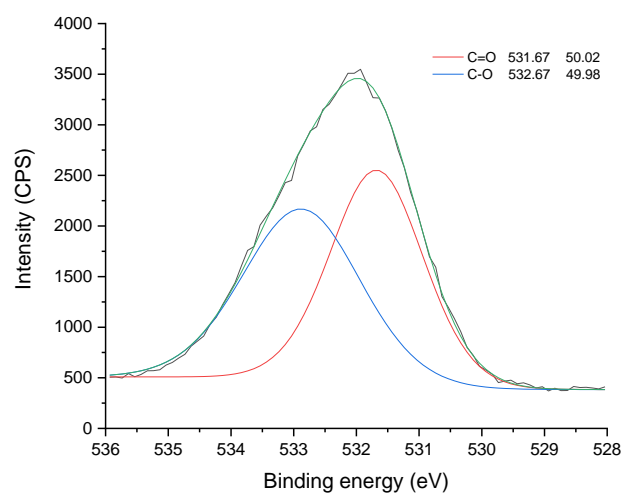

**Figure S2** – XPS O 1s spectra for calcinated- (top), microwave- (middle) and hydrothermal-based (bottom) C-dots.

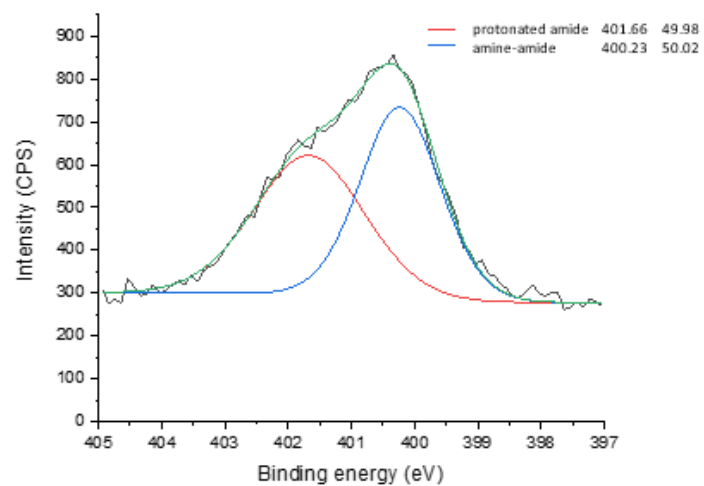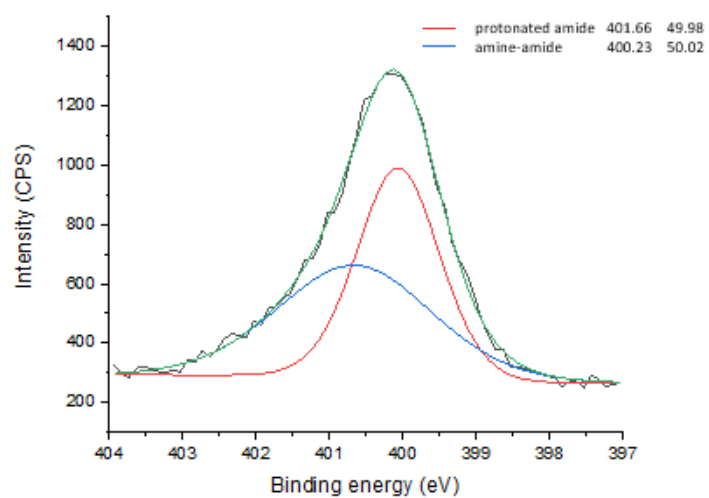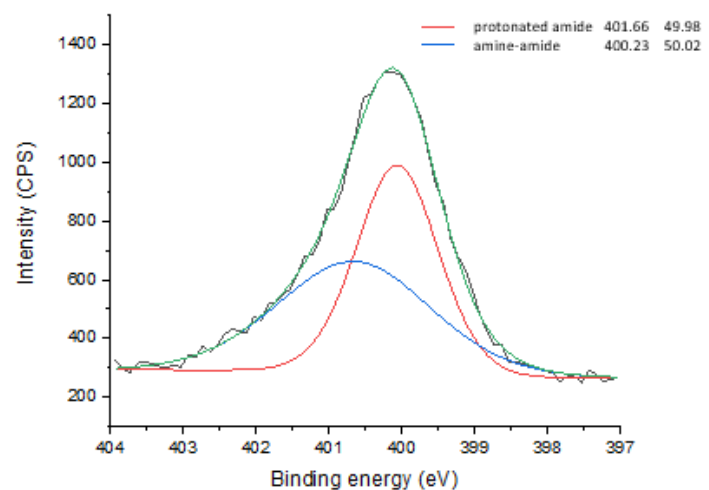

**Figure S3** – XPS N 1s spectra for calcinated- (top), microwave- (middle) and hydrothermal-based (bottom) C-dots.

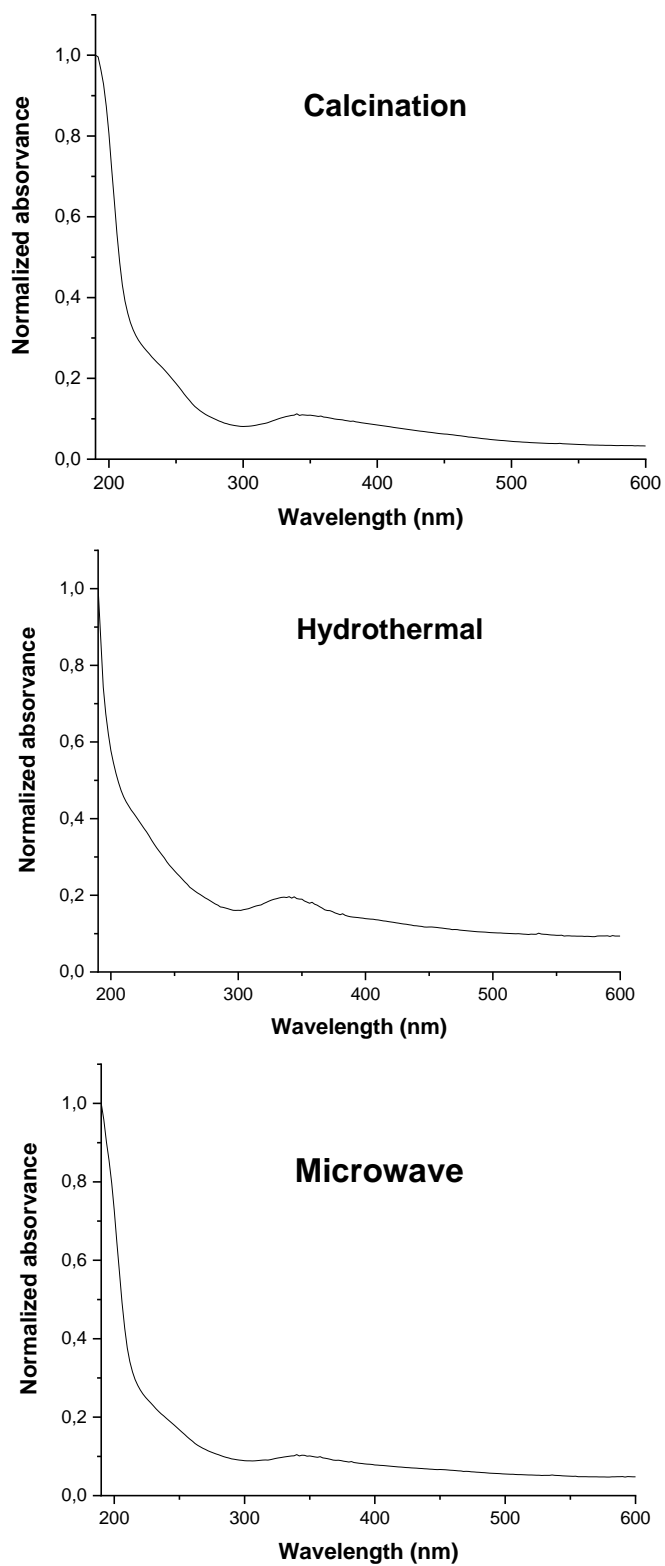

**Figure S4** – Normalized absorbance spectra for calcinated- (top), hydrothermal- (middle) and microwave-based (bottom) C-dots, in aqueous solution.

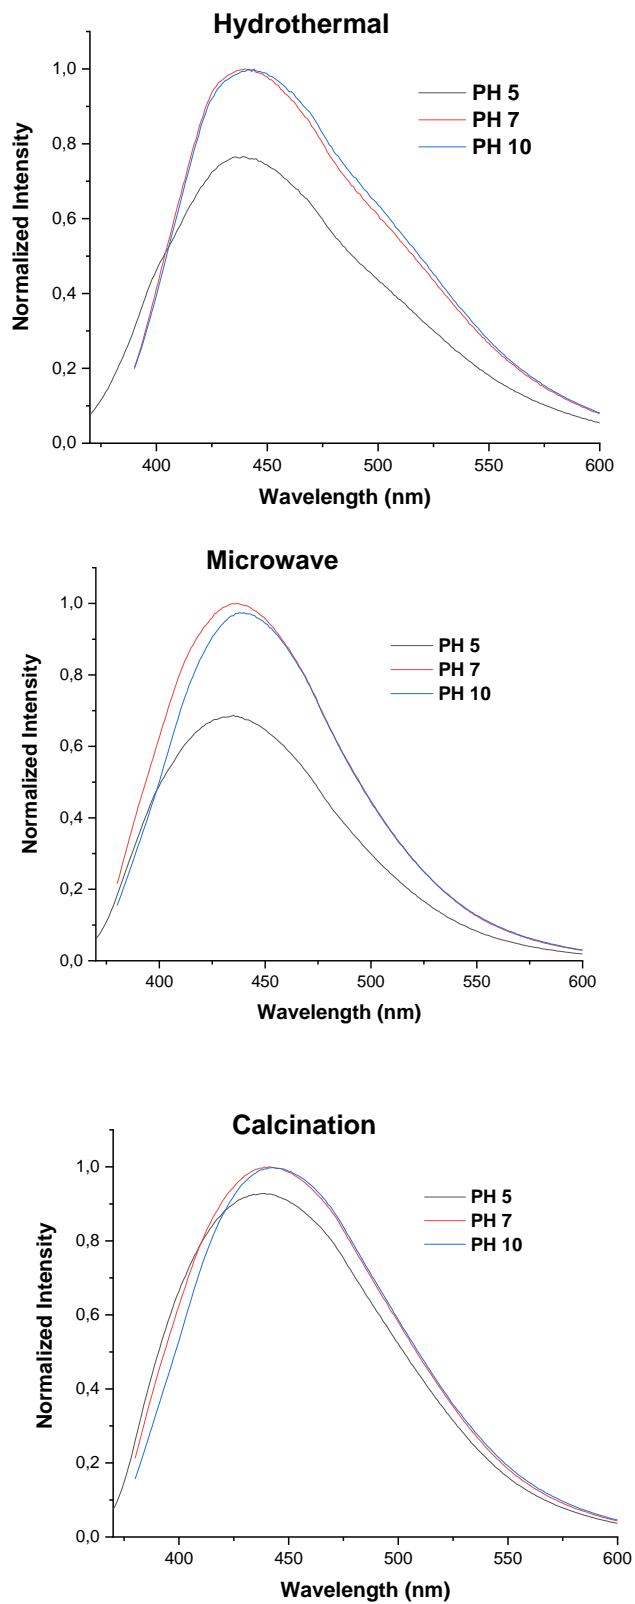

**Figure S5** – Normalized emission spectra for hydrothermal- (top), microwave- (middle) and calcination-based (bottom) C-dots, in aqueous solution at different pHs (5, 7 and 10).
